# Supplementary material for: One-step electropolymerization of xanthurenic acid–graphene film prepared by a pulse potentiostatic method for simultaneous detection of guanine and adenine
Source: Royal Society of Chemistry journal article supplement (doi:10.1039/c3py00997a), 2014-01-01
Supplement: c3py00997a.pdf [file c3py00997a.pdf]

## **Supplementary Materials**

# **One-step electropolymerization of xanthurenic acid-graphene film prepared by pulse potentiostatic method for simultaneous detection of guanine and adenine**

Tao Yang,\* Qianqian Kong, Qianhe Li, Xinxing Wang, Lihua Chen, and Kui Jiao

Key Laboratory of Sensor Analysis of Tumor Marker of Education Ministry, College of Chemistry and Molecular Engineering, Qingdao University of Science and Technology, Qingdao 266042,

P.R.China

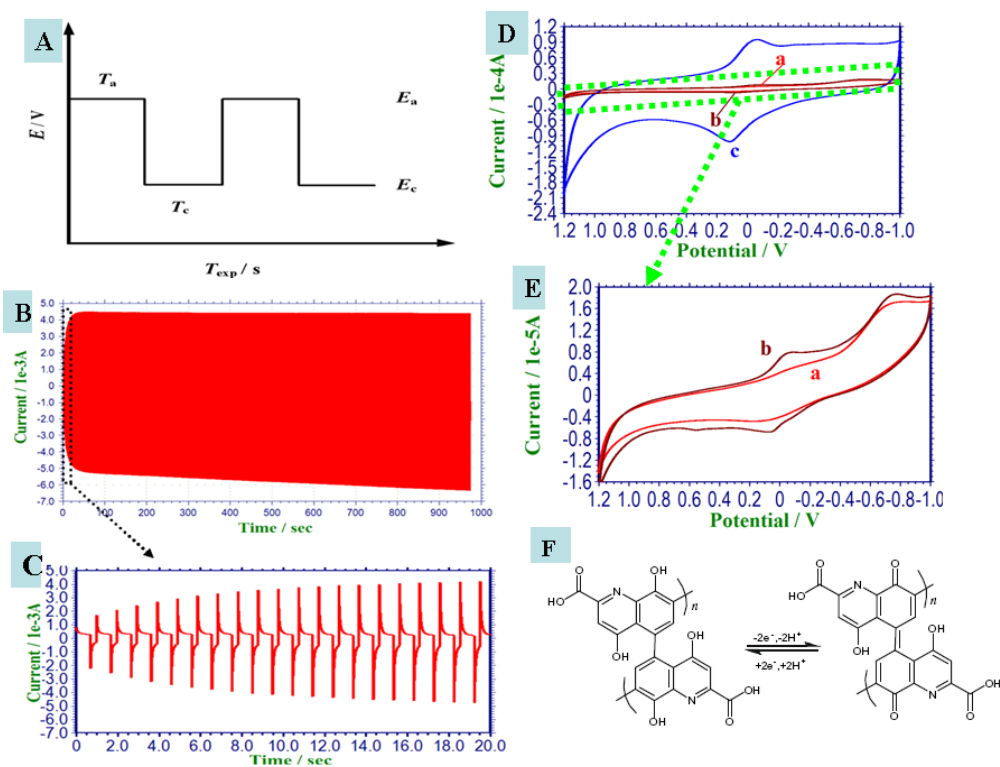

**Fig. S1.** (A) Schematic representation; (B, C) experimental images of the pulse potentiostatic method (PPM). (D,E) CVs of GCE (a); PXa/GCE (b), and PXa-ERGNO/GCE (c) obtained from PPM recorded in 0.3 mol/L PBS (pH 7.0). (F) The electrochemical process of PXa polymer

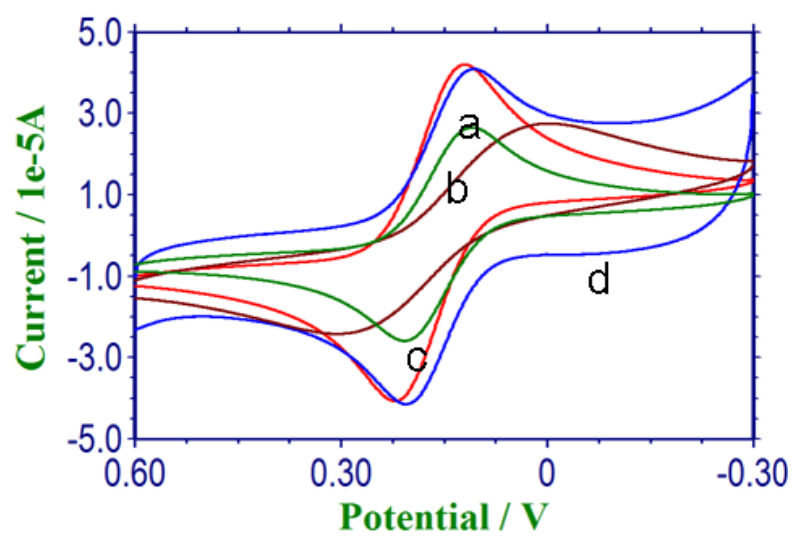

Fig. S2 CVs of  $[\text{Fe}(\text{CN})_6]^{3-/4-}$  recorded at GCE (a), PXa/GCE (b), ERGNO/GCE(c), PXa-ERGNO/GCE(d) obtained from PPM

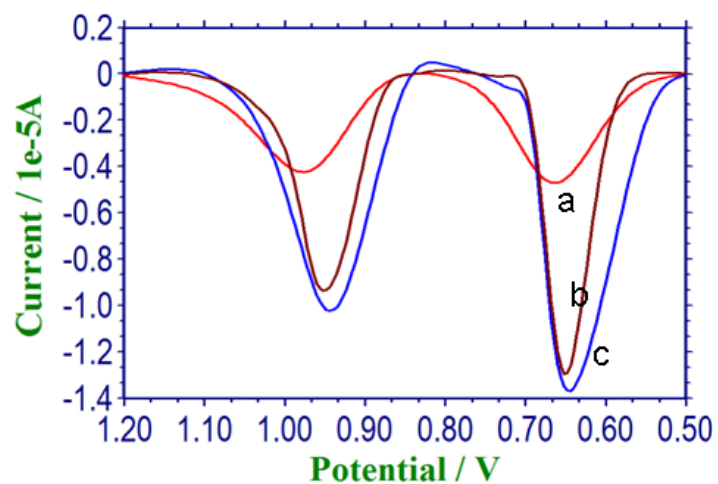

Fig. S3 Baseline-corrected DPVs of  $3 \times 10^{-4}$  mol/L guanine and  $3 \times 10^{-4}$  mol/L adenine recorded at PXa-ERGNO/GCE prepared under different values of  $E_c$  : (a) -0.8 V, (b) -1.3 V, (c) -1.6 V with  $E_a = 0.65$  V,  $T_{\text{exp}} = 1000$  s,  $T_c/T_a = 7/3$  (one pulse period was 1 s).

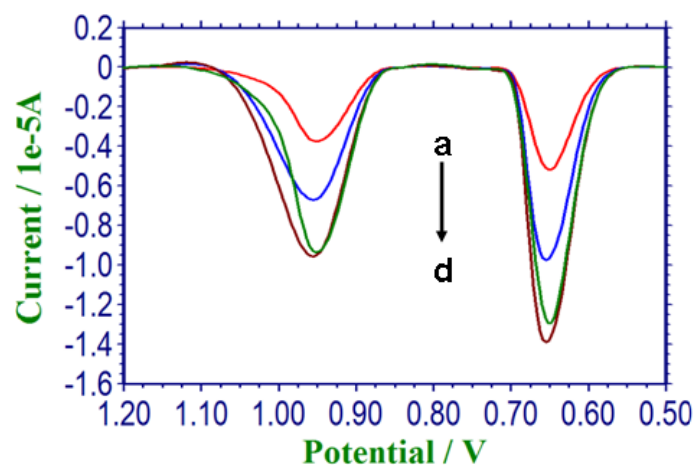

Fig. S4 Baseline-corrected DPV of  $3 \times 10^{-4}$  mol/L guanine and  $3 \times 10^{-4}$  mol/L adenine recorded at PXa-ERGNO/GCE with different  $T_{\text{exp}}$ : (a) 500 s, (b) 800 s (c) 1000 s, (d) 2000 s, with  $E_a = 0.65$  V,  $E_c = -1.3$  V and  $T_c/T_a = 7/3$  (one pulse period was 1 s).

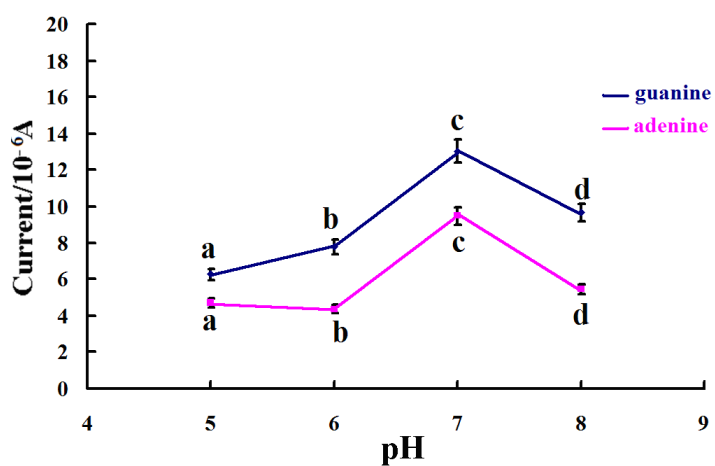

Fig. S5 Calibration plots of the oxidation peak current of guanine and adenine versus different values of pH.

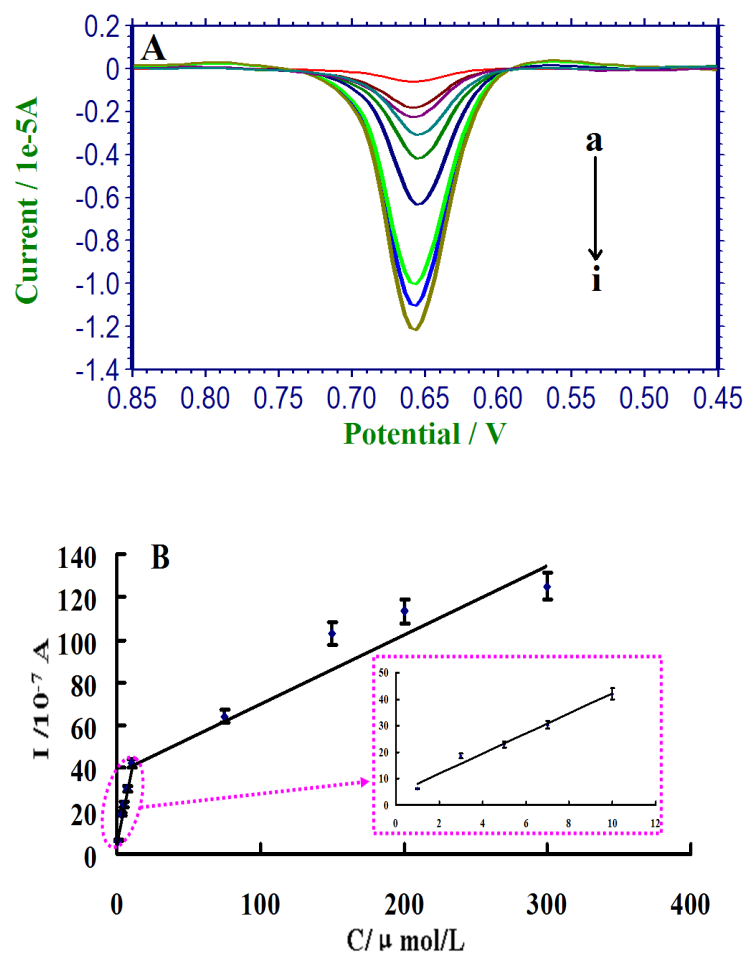

Fig. S6 (A) Baseline-corrected DPVs of various guanine concentrations at PXa-ERGNO/GCE (from a to i: 1, 3, 5, 7, 10, 75, 150, 200, 300  $\mu mol/L$ ); (B) Calibration plots of the oxidation peak current versus different concentrations of guanine.

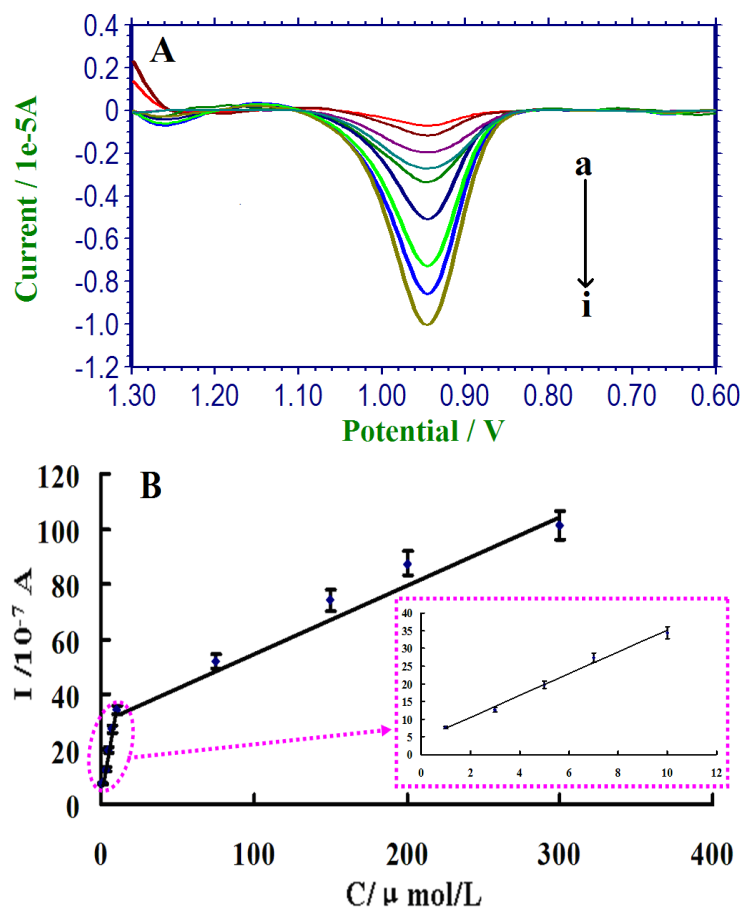

Fig. S7 (A) Baseline-corrected DPVs of various adenine concentrations at PXa-ERGNO/GCE (from a to i: 1, 3, 5, 7, 10, 75, 150, 200, 300  $\mu\text{mol/L}$ ); (B) Calibration plots of the oxidation peak current versus different concentrations of adenine.



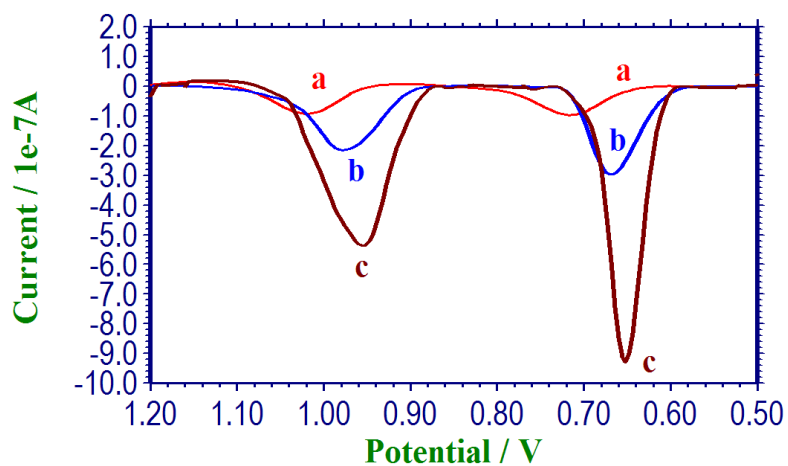

**Fig. S8** Baseline-corrected DPVs of  $1 \times 10^{-6}$  mol/L guanine and adenine at different modified electrodes: (a) PXa, (b) ERGNO, and (c) PXa-ERGNO obtained from PPM

**Table S1** Comparison of different modified electrodes (PXa, ERGNO, and PXa-ERGNO) obtained from PPM for  $1 \times 10^{-6}$  mol/L guanine (G) and adenine (A) detection

| Electrodes    | Bases | Methods | Potential (V)   |
|---------------|-------|---------|-----------------|
| PXa/GCE       | G+A   | DPV     | 0.72(G),1.02(A) |
| ERGNO/GCE     | G+A   | DPV     | 0.67(G),0.97(A) |
| PXa-ERGNO/GCE | G+A   | DPV     | 0.65(G),0.95(A) |

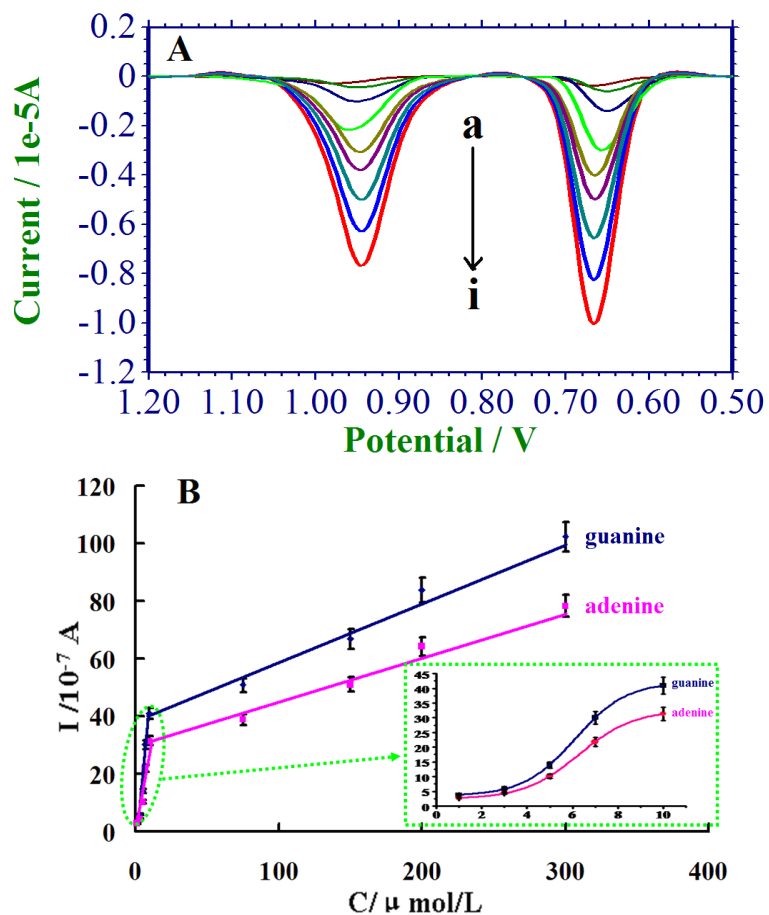

**Fig. S9** (A) Baseline-corrected DPVs of different guanine and adenine concentrations at ERGNO/GCE obtained from PPM (from a to i: 1, 3, 5, 7, 10, 75, 150, 200, 300 μmol/L); (B) Calibration plots of the oxidation peak current versus different concentrations of guanine and adenine.

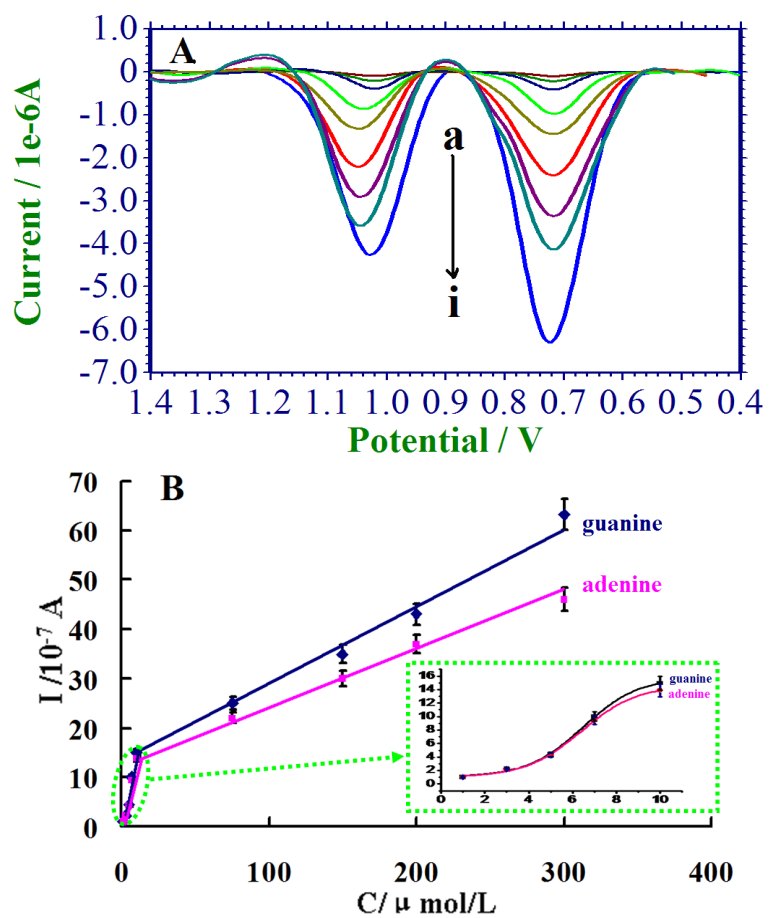

**Fig. S10** (A) Baseline-corrected DPVs of different guanine and adenine concentrations at PXa/GCE obtained from PPM (from a to i: 1, 3, 5, 7, 10, 75, 150, 200, 300 μmol/L); (B) Calibration plots of the oxidation peak current versus different concentrations of guanine and adenine.

**Table S2** Comparison of different modified electrodes with previous reports for guanine (G) and adenine (A)

| Electrodes                                  | Bases | Methods | Potential (V)    | Linear rang( $\mu\text{mol/L}$ ) | Detection limit( $\text{mol/L}$ )                  |
|---------------------------------------------|-------|---------|------------------|----------------------------------|----------------------------------------------------|
| Our work                                    | G     | DPV     | 0.65             | 1-10;10-300                      | $4.0 \times 10^{-7}$                               |
| PXa-ERGNO/GCE(PPM)                          | A     | DPV     | 0.95             | 1-10;10-300                      | $6.0 \times 10^{-7}$                               |
|                                             | G+A   | DPV     | 0.65(G),0.95(A)  | 1-10;10-300                      | $5.5 \times 10^{-7}$ (G), $7.3 \times 10^{-7}$ (A) |
|                                             | G     | DPV     | 0.97             | 8-68                             |                                                    |
| TiO <sub>2</sub> -graphene/GCE <sup>1</sup> | A     | DPV     | 1.26             | 6-72                             |                                                    |
|                                             | G+A   | DPV     |                  | 0.5-200(G),0.5-200(A)            | $1.5 \times 10^{-7}$ (G), $1.0 \times 10^{-7}$ (A) |
|                                             | G     | DPV     | 0.9              | 0.5-200                          | $5.0 \times 10^{-8}$                               |
| graphene-COOH/GCE <sup>2</sup>              | A     | DPV     | 1.3              | 0.5-200                          | $2.5 \times 10^{-8}$                               |
|                                             | G+A   | DPV     | 0.9(G),1.23(A)   | 0.5-200(G),0.5-200(A)            | $5.0 \times 10^{-8}$ (G), $2.5 \times 10^{-8}$ (A) |
|                                             | G     | DPV     |                  | 2-200                            | $5.8 \times 10^{-7}$                               |
| graphene-Nafion/GCE <sup>3</sup>            | A     | DPV     |                  | 5-200                            | $7.5 \times 10^{-7}$                               |
|                                             | G+A   | DPV     | 0.82(G),1.184(A) | 4-200(G),8-150(A)                |                                                    |

1 Y. Fan, K. J. Huang, D. J. Niu, C. P. Yang and Q. S. Jing, *Electrochim. Acta*, 2011, **56**, 4685.

2 K. J. Huang, D. J. Niu, J. Y. Sun, C. H. Han, Z. W. Wu, Y. L. Li and X. Q. Xiong, *Colloids Surf. B*, 2011, **82**, 543.

3 H. S. Yin, Y. L. Zhou, Q. Ma, S. Y. Ai, P. Ju, L. S. Zhu and L. N. Lu, *Process Biochem.*, 2010, **45**, 1707.

#### Stability and reproducibility of the modified electrode

The stability of the PXa-ERGNO modified electrode was tested. The electrochemical responses of modified electrodes preserved about 91.1% and 87.8% of original values of guanine and adenine after being stored at the room temperature for four days, indicating that the electrode has good stability. The relative standard deviation (RSD) was 7.6% for the oxidation peak current of  $1.0 \times 10^{-6}$  mol/L base with five PXa-ERGNO modified electrodes which were made in the same condition, demonstrating the excellent reproducibility.<sup>4</sup>

<sup>4</sup> M. Zhou, Y. M. Zhai and S. J. Dong, *Anal. Chem.*, 2009, **81**, 5603.
